# Supplementary material
Source: PubMed Central journal article supplement (PMC3316655)
Supplement: supp_111.137570_137570SI.pdf [file supp_111.137570_137570SI.pdf]

## File S1

### Details of files submitted as Supporting Information

We provide two collections of data and processed output files from our simulation study. Many other files can be made available by request.

File S2 ([data\\_files.tar.gz](#); see next page 3SI) consists of the marker map and frequencies, the true ibd states among our 500 pairs of individuals sampled for the study, and the generated haplotypes of the 100 individuals who provide these 500 pairs. The files included in the S2 tar archive are

|                                                     |                                                                                                                                                                                    |
|-----------------------------------------------------|------------------------------------------------------------------------------------------------------------------------------------------------------------------------------------|
| samp500_9_trueibd.txt                               | The true genotypic ibd state, by marker, for the sample of 500 pairs.                                                                                                              |
| samp500_15_trueibd.txt                              | The true haplotypic ibd state, by marker, for the sample of 500 pairs                                                                                                              |
| posandfreq.txt                                      | position in cM and allele frequencies of the markers simulated                                                                                                                     |
|                                                     |                                                                                                                                                                                    |
| haps_LD_[gamma].txt<br>where gamma = 00, 05, 10,100 | The simulated haplotypes for the 100 individuals generated at LD level gamma,<br>where gamma = 0 (very high LD), 0.05 (moderately high), 0.1 (moderately low),<br>and 1.00 (no LD) |

File S3 ([sweave\\_ldresults.tar.gz](#); see following page 4SI) contains the output files of inferred states from running `ibd_haplo` in MORGAN 3.0.3 (Fall 2011 release), to produce "qibd" files and then calling the states using the R-package `IBDhaploRtools` (Fall 2011 release) as described in the paper. The qibd files provide the probabilities of each ibd state, at each marker, for each of the 500 pairs of individuals. We have not provided the original qibd files, since each of the 22 files is approx 400 Mb (and 30Mb even when compressed).

Instead we have provided the called state results from each of these runs in the form of an Rdata file, together with a Sweave document that can be used together with the the R-package `IBDhaploRtools` (Fall 2011 release) and used to regenerate the tables and figures of our study. We have provided only the 22 files of inferred ibd states that provide the results tabulated in the paper. The files included in the S3 tar archive are

|                                                    |                                                                                                                                                                                                                                                     |
|----------------------------------------------------|-----------------------------------------------------------------------------------------------------------------------------------------------------------------------------------------------------------------------------------------------------|
| data.files.needed.txt                              | list of the files needed to run the Sweave code                                                                                                                                                                                                     |
| marker.pos.Rdata                                   | marker data (as in File S2) in .Rdata format                                                                                                                                                                                                        |
| samp500_15_trueIBD.txt                             | true hapotypic ibd states (see details for file S2 above)                                                                                                                                                                                           |
| samp500_9_trueIBD.txt                              | true genotypic ibd states (see details for file S2 above)                                                                                                                                                                                           |
|                                                    |                                                                                                                                                                                                                                                     |
| Rplots.pdf,Sweave.sty,<br>create_figures.*         | Sweave files (input and output) required to recreate the figures of the paper relating to the performance of <code>ibd_haplo</code> to infer segments of ibd.                                                                                       |
| create_figures-fig*.pdf<br>create_figures-fig*.eps | PDF and EPS versions of figures 1, 4, and 5 of the paper, as recreated using the Sweave document and <code>IBDhaploRtools</code> R package.                                                                                                         |
|                                                    |                                                                                                                                                                                                                                                     |
| inf_states_h_gamma*_ch.Rdata                       | Inferred states, using haplotypic data, on each of the four data sets at varying LD levels gamma, for four values of gamma = "*" = 0.0, 0.05, 0.1 and 1.0. Run at model parameters alpha=0.05, beta=0.05, and delta=0.1, as described in the paper. |
| inf_states_g_gamma*_ch.Rdata                       | Inferred states, as above, for the same data analyzed as unphased genotypes.                                                                                                                                                                        |
| inf_states_h_fkin*_ch.Rdata                        | Inferred states, using haplotypic data, for the LD (gamma) value 0.1, for two values of beta = "*" = 0.02 and 0.05. With alpha=0.05, delta=0.1 as above.                                                                                            |
| inf_states_g_fkin*_ch.Rdata                        | Inferred states, as above, for the same two beta values, with the data analyzed as unphased genotypes.                                                                                                                                              |
| inf_states_h_ffrate*_ch.Rdata                      | Inferred states, using haplotypic data, for the LD (gamma) value 0.1, for five values of rate parameter alpha = "*" = 0.01, 0.05, 0.1, 0.5, 2.0. With beta=0.05, delta =-0.1 as above.                                                              |
| inf_states_g_ffrate*_ch.Rdata                      | Inferred states, as above, for the same five alpha values, with the data analyzed as unphased genotypes.                                                                                                                                            |

**File S2**

**data\_files.tar.gz**

**File S3**

**sweave\_ldresults.tar.gz**

Files S2 and S3 are available for download as a compressed (gzipped) tar archive at <http://www.genetics.org/content/suppl/2012/01/31/genetics.111.137570.DC1>.
